# Supplementary material for: Antiretrovirals Promote Insulin Resistance in HepG2 Liver Cells through miRNA Regulation and Transcriptional Activation of the NLRP3 Inflammasome
Source: MDPI journal article supplement (doi:10.3390/ijms24076267), 2023-03-27
Supplement: s1 [file s1]

## Supplementary Data

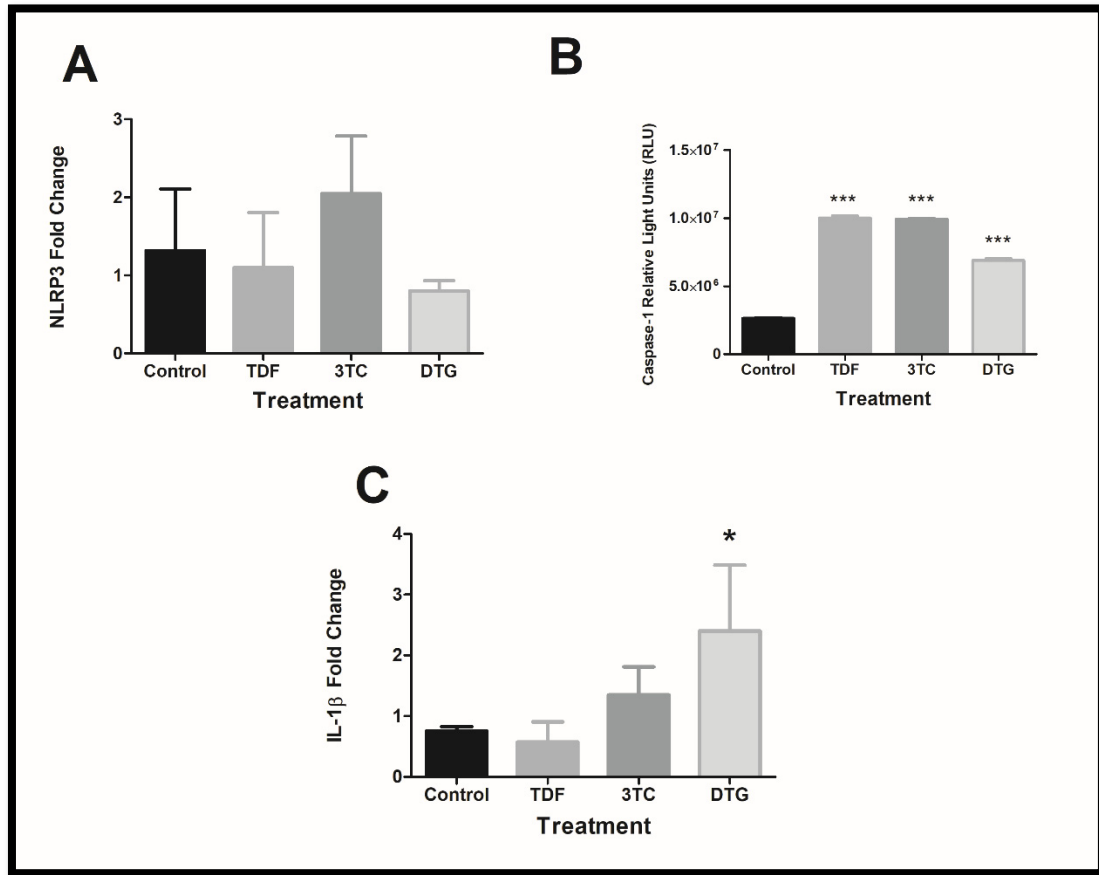

**Supplementary Figure S1.** Individual exposure for tested ARVs. (A) *NLRP3* expression; (B) Caspase-1 activity; (C) *IL-1 $\beta$*  expression. (p: \*\*\*  $p < 0.0001$ ; \*  $p < 0.05$ ).

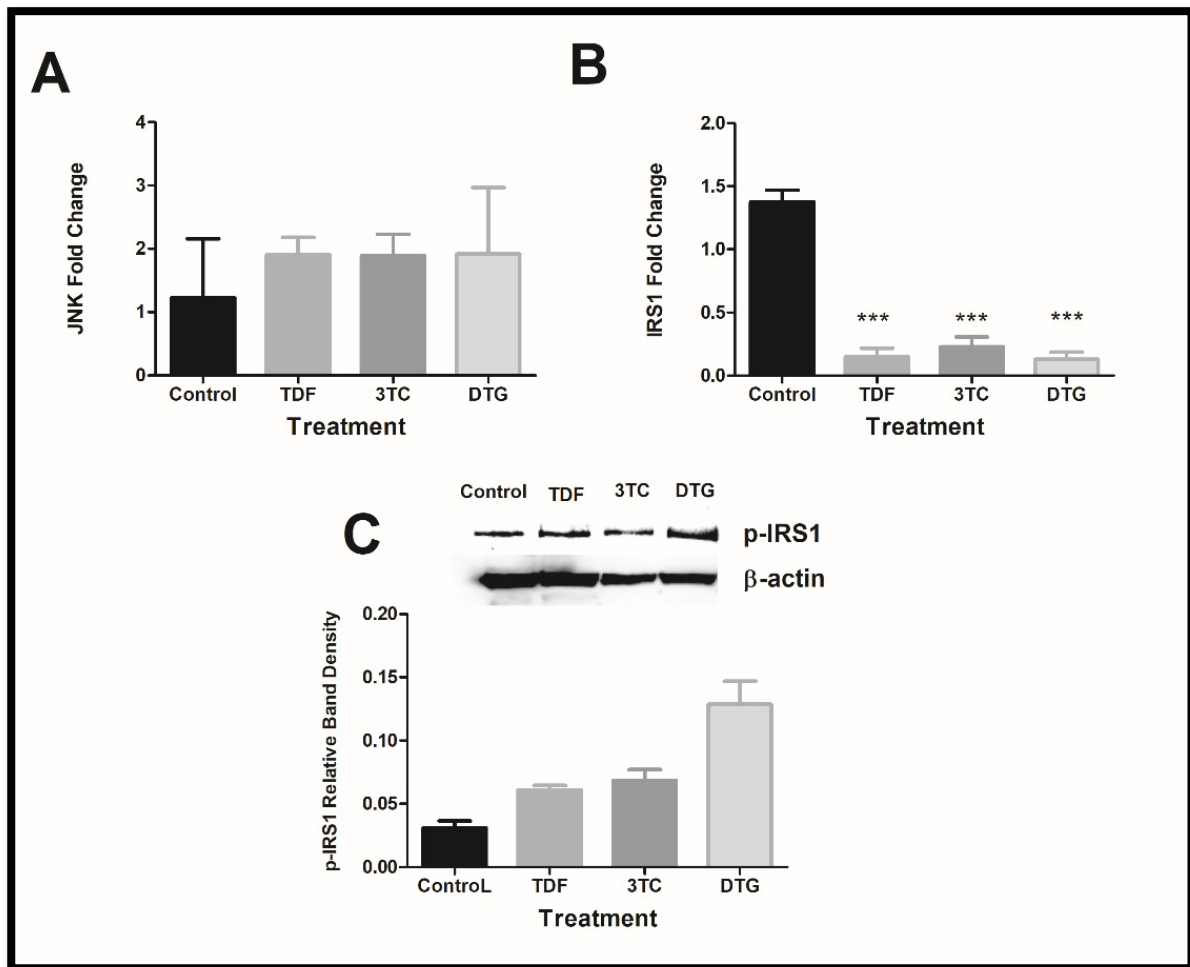

**Supplementary Figure S2.** Individual exposure for tested ARVs. (A) *JNK* expression; (B) *IRS1* expression; (C) *p*-IRS1 protein expression. (*p*: \*\*\* *p* < 0.0001).

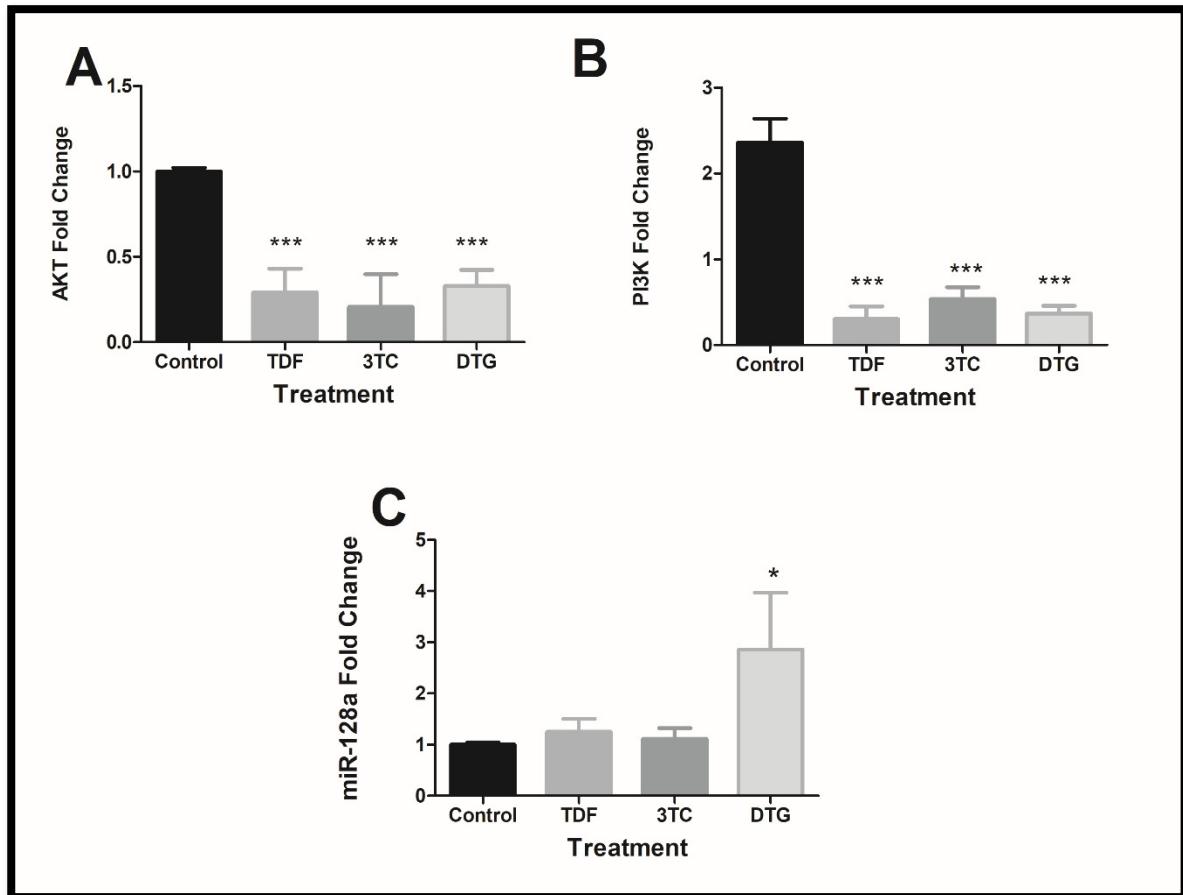

**Supplementary Figure S3.** Individual exposure for tested ARVs. (A) *AKT* expression; (B) *PI3K* expression; (C) miR-128a miRNA expression. (*p*: \*\*\* *p* < 0.0001; \* *p* < 0.05).
